# Supplementary material
Source: PubMed Central journal article supplement (PMC2835258)
Supplement: mt2009134x6.pdf [file mt2009134x6.pdf]

**Supplementary Table S1. Donor chimerism (CD45.2+ cells) final analysis in peripheral blood, bone marrow and spleen of primary recipients.**

| Group / Recipient           | N° of mice | % Donor chimerism, peripheral blood | % Donor chimerism, bone marrow | % Donor chimerism, spleen |
|-----------------------------|------------|-------------------------------------|--------------------------------|---------------------------|
| No vector LSK #1-5          | 5          | 32.0 ± 22.0                         | 17.6 ± 12.4                    | n.d.                      |
| No vector LK #6-10          | 5          | 0.6 ± 0.2                           | 0.2 ± 0.1                      | n.d.                      |
| Gamma-retroviral LSK #11-15 | 5          | 51.8 ± 20.7                         | 60.6 ± 34.1                    | n.d.                      |
| Gamma-retroviral LK #16-20  | 5          | 0.3 ± 0.1                           | 0.8 ± 0.3                      | n.d.                      |
| No vector ST #21-25         | 5          | 45.1 ± 23.4*                        | 30.2 ± 26.0                    | 43.6 ± 21.3               |
| Gamma-retroviral LT #26-30  | 5          | 3.1 ± 4.9                           | 3.1 ± 4.0                      | 2.7 ± 4.4                 |
| Gamma-retroviral ST #31-35  | 5          | 24.6 ± 14.8                         | 39.6 ± 31.3                    | 18.5 ± 8.9                |
| Gamma-retroviral MPP #36-40 | 5          | 3.3 ± 1.7                           | 1.7 ± 0.4                      | 2.4 ± 0.3*                |
| Lentiviral LT #41-45        | 5          | 45.3 ± 17.6                         | 32.6 ± 12.6                    | 40.9 ± 17.5               |
| Lentiviral ST #46-50        | 5          | 73.0 ± 9.9                          | 61.6 ± 7.0                     | 68.5 ± 13.2               |

% of donor chimerism, % of CD45.2+ cells in entire population of cells ± 95% Confidence Interval (CI); n.d., not determined; \*, average donor chimerism calculated for 4 mice.
