# Supplementary material
Source: PubMed Central journal article supplement (PMC2835258)
Supplement: mt2009134x7.pdf [file mt2009134x7.pdf]

**Supplementary Table S2: Insertion sites recovered from gamma-retroviral LSK and LK EGFP progeny (DBISA)**

| recipient     | weeks after BMT | source | locus: within gene or nearest gene | RTCGD (hits N°) | gene ID   | chromo-some | (proposed ) function                                             | pos. to TSS (i, intron; e, exon) | orientation |
|---------------|-----------------|--------|------------------------------------|-----------------|-----------|-------------|------------------------------------------------------------------|----------------------------------|-------------|
| <b>LSK#11</b> |                 |        |                                    |                 |           |             |                                                                  |                                  |             |
| #11           | 11              | PB     | Vwf                                | 1               | 22371     | 6 F3        | Von Willebrand factor homolog                                    | -5126 bp                         | F           |
| #11           | 11              | PB     | Bex6                               | 1               | 328660    | 16 B2       | Brain expressed X-linked 6                                       | 4929 bp                          | F           |
| #11           | 11              | PB     | Tlr1                               | 0               | 21897     | 5 C3.1      | toll-like receptor 1                                             | -1754 bp                         | R           |
| #11           | 16              | PB     | Mpz1                               | 2               | 68481     | 1 H2.3      | myelin protein zero-like 1                                       | 23321 bp                         | R           |
| #11           | 16              | PB     | Adck1                              | 0               | 72113     | 12 E        | aarF domain containing kinase 1                                  | 68741 bp (i3)                    | R           |
| #11           | 16, 27          | PB     | Stk17b                             | 0               | 98267     | 1 C1.1      | serine / threonine kinase 17b                                    | 10466 bp (i2)                    | F           |
| #11           | 16, 27          | PB, BM | Mafg*                              | 0               | 17134     | 11 E2       | v-maf musculoaponeurotic fibrosarcoma oncogene family, protein G | 2600 bp (i1)                     | R           |
| #11           | 16, 27          | PB, BM | Tbc1d10c*                          | 0               | 108995    | 19 A        | TBC1 domain family, member 10c                                   | 4518 bp (i6)                     | F           |
| #11           | 16              | PB     | Diap1                              | 0               | 13367     | 18 B3       | diaphanous homolog 1 (Drosophila): Rho GTPase binding            | 56600 bp (i16)                   | R           |
| #11           | 16, 27          | PB, BM | Ppm1h                              | 2               | 319468    | 10D2        | protein phosphatase 1H                                           | 121292 bp (i2)                   | F           |
| #11           | 16              | PB     | LOC100046630                       | 0               | 100046630 | 14 A3       | similar to CDC28 protein kinase 1b                               | -41178 bp                        | R           |
| #11           | 16              | PB     | EG665934                           | 0               | 665934    | 5 B         | predicted gene                                                   | -16189 bp                        | R           |
| #11           | 27              | PB     | Cldn14                             | 0               | 56173     | 16 C4       | claudin 14                                                       | -24027 bp                        | R           |
| #11           | 27              | BM     | Arhgef7                            | 0               | 54126     | 54126       | Rho guanine nucleotide exchange factor                           | 20098 bp (i1)                    | F           |
| #11           | 27              | BM     | Crsp2                              | 1               | 26896     | X A1.1      | cofactor required for Sp1 transcriptional activation, subunit 2  | 1665 bp (i1)                     | F           |
| #11           | 27              | BM     | 5330437I02Rik                      | 0               | 319888    | 18 E1       | endopeptidase inhibitor activity                                 | -1769 bp                         | R           |
| <b>LSK#12</b> |                 |        |                                    |                 |           |             |                                                                  |                                  |             |
| #12           | 5, 16, 23, 27   | PB, BM | Brd7                               | 0               | 26992     | 8 C4        | bromodomain containing 7                                         | -490 bp                          | F           |
| #12           | 5, 16, 23, 27   | PB, BM | Evi1                               | 24              | 14013     | 3 A3        | ecotropic viral integration site 1                               | -205054 bp                       | R           |
| #12           | 5, 11, 27       | PB     | Ccdc21*                            | 0               | 70012     | 4 D3        | coiled-coil domain containing 21                                 | 27671 bp (i3)                    | R           |
| #12           | 5, 11           | PB     | Pim1*                              | 38              | 18712     | 17 A3.3     | proviral integration site 1                                      | 4864 bp (e3)                     | F           |
| #12           | 5               | PB     | Tex14                              | 0               | 83560     | 11 C        | testis expressed gene 14: protein / tyrosine kinase              | 36445 bp (i14)                   | R           |
| #12           | 11, 16, 27      | PB, BM | Patz1*                             | 1               | 56218     | 11 A1       | POZ (BTB) and AT hook containing zinc finger 1                   | 21443 bp                         | F           |
| #12           | 11, 16          | PB     | 2610018G03Rik                      | 0               | 70415     | X A3.3      | protein kinase activity                                          | -6022 bp                         | F           |
| #12           | 11              | PB     | Nox1*                              | 0               | 237038    | X E3        | NADPH oxidase 1                                                  | 636 bp                           | F           |
| #12           | 16, 23, 27      | PB, BM | Ak2                                | 2               | 11637     | 4 D2.2      | adenylate kinase 2:                                              | 32904 bp                         | F           |
| #12           | 16              | PB     | Zfp160                             | 0               | 224585    | 17 A3.2     | zinc finger protein 160                                          | 872 bp (i1)                      | R           |
| #12           | 23              | PB     | LOC671336                          | 0               | 671336    | 1 G3        | hypothetical                                                     | 5846 bp                          | R           |
| <b>LSK#13</b> |                 |        |                                    |                 |           |             |                                                                  |                                  |             |
| #13           | 5               | PB     | Gpr146*                            | 0               | 80290     | 5 G1        | G protein-coupled receptor 146: signal transduction              | 1722 bp (i1)                     | F           |
| #13           | 5               | PB     | LOC664909                          | 0               | 664909    | 18 A1       | similar to carbohydrate sulfotransferase 10                      | 17509 bp                         | R           |

|               |                |        |                        |      |           |         |                                                                                    |                |      |
|---------------|----------------|--------|------------------------|------|-----------|---------|------------------------------------------------------------------------------------|----------------|------|
| #13           | 16             | PB     | Enpp4                  | 0    | 224794    | 17 B3   | ectonucleotide pyrophosphatase / phosphodiesterase 4: metabolic                    | 4361 bp (i3)   | R    |
| #13           | 16, 27         | PB, BM | Gm969                  | 0    | 381229    | 19 D1   | gene model                                                                         | -221 bp        | F    |
| #13           | 16, 27         | PB, BM | D17Wsu92e*             | 0    | 224647    | 17 A3.3 | DNA segment, Chr 17, Wayne State University 92, expressed                          | -4979 bp       | F    |
| #13           | 16             | PB     | Rab27a*                | 0    | 11891     | 9 D     | member RAS oncogene family                                                         | 10375 bp (i1)  | R    |
| #13           | 16, 27         | PB     | Rpl38                  | 1    | 67671     | 11 G1   | ribosomal protein L38                                                              | -103663 bp     | F    |
| #13           | 27             | PB     | Irf2                   | 5    | 16363     | 8 B2    | interferon regulatory factor 2: transcription factor                               | 6481 bp (i1)   | F    |
| #13           | 27             | PB     | LOC100040725           | 0    | 100040725 | 13 D2.2 | hypothetical                                                                       | -3934 bp       | F    |
| #13           | 27             | BM     | Kbtbd7*                | 0    | 211255    | 14 D3   | kelch repeat and BTB (POZ) domain containing 7                                     | 15258 bp       | R    |
| <b>LSK#14</b> |                |        |                        |      |           |         |                                                                                    |                |      |
| #14           | 5              | PB     | LOC623327              | 0    | 623327    | 1 E4    | hypothetical                                                                       | 39641 bp (i1)  | R    |
| #14           | 11, 27         | PB     | Zmiz1                  | 9    | 328365    | 14 A3   | retinoic acid induced 17: transcription factor, zinc finger, MIZ-type containing 1 | 69880 bp (i2)  | R    |
| #14           | 11             | PB     | Comm7                  | 0    | 99311     | 2 H1    | COMM domain containing 7                                                           | 24038 bp       | F    |
| #14           | 11             | PB     | Col11a2*               | 0    | 12815     | 17 B1   | procollagen, type XI, alpha 2: a novel retinoic acid-response element              | 18355 bp (i36) | F    |
| #14           | 11, 16         | PB     | Reep5                  | 1    | 13476     | 18 B1   | receptor accessory protein 5                                                       | 466 bp         | R    |
| #14           | 16             | PB     | Hemgn                  | 0    | 93966     | 4 B1    | hemogen: unknown; cell diff.                                                       | 116 bp (e1)    | R    |
| #14           | 16             | PB     | Skap2                  | 2    | 54353     | 6 B3    | src family associated phosphoprotein 2: B cell activation; signaling               | -1168 bp       | R    |
| <b>LSK#15</b> |                |        |                        |      |           |         |                                                                                    |                |      |
| #15           | 11             | PB     | Nek10                  | 0    | 238944    | 14 A1   | NIMA (never in mitosis gene a)- related kinase 10                                  | 279370 bp      | R    |
| #15           | 11             | PB     | LOC668840              | 0    | 668840    | 3 G3    | 60S ribosomal protein L7a pseudogene                                               | 24882 bp       | F    |
| #15           | 11             | PB     | Fbnp1                  | 5    | 14269     | 2 B     | formin binding protein 1: RNA binding                                              | -1802 bp       | F    |
| #15           | 11             | PB     | Reep5                  | 1    | 13476     | 18 B1   | receptor accessory protein 5                                                       | 466 bp         | R    |
| #15           | 11, 16, 23, 27 | PB, BM | Sox7                   | 0    | 20680     | 14 C3   | SRY-box containing gene 7: repression of Wnt signaling                             | -639 bp        | F    |
| #15           | 27             | BM     | Rhoh                   | 0    | 74734     | 5 D     | ras homolog gene family, member H                                                  | 20329 bp       | R    |
| #15           | 27             | BM     | Olf56*                 | 0    | 18356     | 11 B1.2 | olfactory receptor 56                                                              | 26114 bp (i1)  | F    |
| #15           | 27             | BM     | Scarb2                 | 0    | 12492     | 5 E3    | scavenger receptor class B, member 2                                               | 29826 bp (i2)  | F    |
| <b>LK#16</b>  |                |        |                        |      |           |         |                                                                                    |                |      |
| #16           | 11             | PB     | hit into repeat region | n.a. | n.a.      | n.a.    | n.a.                                                                               | n.a.           | n.a. |
| #16           | 11             | PB     | hit into repeat region | n.a. | n.a.      | n.a.    | n.a.                                                                               | n.a.           | n.a. |
| #16           | 11             | PB     | no s.h.                | n.a. | n.a.      | n.a.    | n.a.                                                                               | n.a.           | n.a. |
| #16           | 16             | PB     | hit into repeat region | n.a. | n.a.      | n.a.    | n.a.                                                                               | n.a.           | n.a. |
| <b>LK#17</b>  |                |        |                        |      |           |         |                                                                                    |                |      |
| #17           | 5              | PB     | Zfp458                 | 0    | 238690    | 13 B3   | zinc finger protein 458                                                            | 37 kb          | R    |
| #17           | 5              | PB     | hit into repeat region | n.a. | n.a.      | n.a.    | n.a.                                                                               | n.a.           | n.a. |
| #17           | 11             | PB     | Pus7                   | 0    | 78697     | 5A3     | pseudouridylate synthase 7 homolog (S. cerevisiae)                                 | 74 kb          | F    |
| #17           | 16             | PB     | no s.h.                | n.a. | n.a.      | n.a.    | n.a.                                                                               | n.a.           | n.a. |
| <b>LK#18</b>  |                |        |                        |      |           |         |                                                                                    |                |      |

|              |    |    |                        |      |        |       |                                                                                           |               |      |
|--------------|----|----|------------------------|------|--------|-------|-------------------------------------------------------------------------------------------|---------------|------|
| #18          | 5  | PB | Ldoc1l                 | 0    | 223732 | 15 E2 | leucine zipper, down-regulated in cancer 1-like                                           | 8474 bp       | F    |
| #18          | 5  | PB | no s.h.                | n.a. | n.a.   | n.a.  | n.a.                                                                                      | n.a.          | n.a. |
| #18          | 11 | PB | Stat5b                 | 9    | 20851  | 11D   | signal transducer and activator of transcription 5B                                       | -2854 bp      | R    |
| #18          | 11 | PB | LOC434047              | 0    | 434047 | 5 A3  | heat shock protein 8 pseudogene                                                           | 5988 bp       | F    |
| #18          | 11 | PB | Pus7                   | 0    | 78697  | 5A3   | pseudouridylylase 7 homolog (S. cerevisiae)                                               | 74 kb         | F    |
| #18          | 11 | PB | Serinc3                | 8    | 26943  | 2 H3  | serine incorporator 3:TDE1 inhibits apoptosis and stimulates tumorigenesis                | 2475 bp (i1)  | R    |
| #18          | 11 | PB | no s.h.                | n.a. | n.a.   | n.a.  | n.a.                                                                                      | n.a.          | n.a. |
| #18          | 16 | PB | Sorl1                  | 2    | 20660  | 9 A5  | sortilin-related receptor, LDLR class A repeats-containing: signaling                     | 211846 bp     | F    |
| #18          | 16 | PB | hit into repeat region | n.a. | n.a.   | n.a.  | n.a.                                                                                      | n.a.          | n.a. |
| <b>LK#19</b> |    |    |                        |      |        |       |                                                                                           |               |      |
| #19          | 5  | PB | Cd300lb                | 0    | 217304 | 11 E2 | receptor activity                                                                         | 17810 bp      | R    |
| #19          | 5  | PB | BC017647               | 0    | 216971 | 11 B5 | hypothetical protein                                                                      | 4561 bp (i1)  | F    |
| #19          | 11 | PB | Zfp458                 | 0    | 238690 | 13 B3 | zinc finger protein 458                                                                   | 37 kb         | R    |
| #19          | 11 | PB | Ccdc21                 | 0    | 70012  | 4 D3  | coiled-coil domain containing 21:Chromosome segregation ATPases [Cell division and chromo | 27659 bp (i3) | R    |
| #19          | 16 | PB | Btrc                   | 0    | 12234  | 19 D1 | beta-transducin repeat containing protein: ubiquitin; Wnt signaling                       | 174326 bp     | R    |
| <b>LK#20</b> |    |    |                        |      |        |       |                                                                                           |               |      |
| #20          | 5  | PB | Ccdc21                 | 0    | 70012  | 4 D3  | coiled-coil domain containing 21:Chromosome segregation ATPases [Cell division and chromo | 27659 bp (i3) | R    |
| #20          | 16 | PB | Sorl1                  | 2    | 20660  | 9 A5  | sortilin-related receptor, LDLR class A repeats-containing: signaling                     | 211846 bp     | F    |
| #20          | 16 | PB | Zfp458                 | 0    | 238690 | 13 B3 | zinc finger protein 458                                                                   | 37 kb         | R    |

Insertional coordinates are given based on the NCBI database, June-December 2007; RTCGD membership is given based on the database's information accessible between June-December, 2007;

PB, total peripheral blood; BM, total bone marrow; TSS, transcriptional start site (NCBI definition); \*, located in gene dense region: more than 3 genes within 50 kb from each RVIS side; n.a., not applicable

no s.h., no significant homology found.
