# Supplementary material
Source: PubMed Central journal article supplement (PMC2835258)
Supplement: mt2009134x8.pdf [file mt2009134x8.pdf]

**Supplementary Table S3: Insertion sites recovered from gamma-retroviral LTHSC, STHSC and MPP EGFP progeny (DBISA)**

| Mouse ID      | weeks after BMT | Source           | locus: within gene or nearest gene | RTCGD (hits N°) | gene ID           | chromosome | (proposed) function                                                                     | pos. to TSS (i, intron; e, exon) | orientation |
|---------------|-----------------|------------------|------------------------------------|-----------------|-------------------|------------|-----------------------------------------------------------------------------------------|----------------------------------|-------------|
| <b>1° BMT</b> |                 |                  |                                    |                 |                   |            |                                                                                         |                                  |             |
| <b>LT#26</b>  |                 |                  |                                    |                 |                   |            |                                                                                         |                                  |             |
| #26           | 12, 19          | PB               | Dnm2                               | 0               | 13430             | 9A3        | dynamins 2: GTP binding / cytoskeleton                                                  | 38118 bp (i2)                    | R           |
| #26           | 26, 31          | PB, BM, Spl      | Samm50                             | 0               | 68653             | 15E2       | sorting and assembly machinery component 50 homolog (S. cerevisiae)                     | 16492 bp (i12)                   | R           |
| <b>ST#31</b>  |                 |                  |                                    |                 |                   |            |                                                                                         |                                  |             |
| #31           | 26, 31          | PB, BM, Spl, Liv | Nln                                | 0               | 75805             | 13 D1      | neurolysin (metallopeptidase M3 family)                                                 | 64844 bp (i9)                    | F           |
| #31           | 31              | BM               | D030011O10Rik                      | 1               | 320560            | 6 G3       | RIKEN cDNA D030011O10 gene: domains involved in Rab-, Ras-signaling                     | 6438 bp (i1)                     | R           |
| #31           | 26, 31          | PB, BM           | <i>Bach2</i>                       | 14              | 12014             | 4 A5       | BTB and CNC homology 2: neuronal cells differentiation                                  | 113297 bp (i2)                   | R           |
| #31           | 31              | liver            | Txnip*                             | 1               | 56338             | 3 F2       | thioredoxin interacting protein: stress-responsive protein                              | -2676 bp                         | F           |
| #31           | 31              | liver            | Eno1*                              | 0               | 13806             | 4 E2       | enolase 1, alpha non-neuron: glycolysis                                                 | -788 bp                          | F           |
| #31           | 31              | liver            | Reep3                              | 2               | 28193             | 10 B5.1    | receptor accessory protein 3                                                            | -7123 bp                         | R           |
| #31           | 26              | PB               | LOC100040414                       | 0               | 100040414         | 1 D        | similar to ribosomal protein L30                                                        | 6897 bp                          | F           |
| <b>ST#32</b>  |                 |                  |                                    |                 |                   |            |                                                                                         |                                  |             |
| #32           | 31              | PB, BM           | Mrpl1                              | 0               | 94061             | 5 E3       | mitochondrial ribosomal protein L1                                                      | -811 bp                          | F           |
| #32           | 12, 31          | PB, BM           | Edem2* / Procr*                    | 0 / 0           | 108687 / 19124    | 2 H1       | ER degradation enhancer, mannosidase alpha-like 2 / protein C receptor, endothelial     | -8598 bp / -13368 bp             | F / R       |
| #32           | 12, 26, 31      | PB, BM, Spl      | Smad3                              | 7               | 17127             | 9 C        | MAD homolog 3 (Drosophila): TF                                                          | 7426 bp (i1)                     | R           |
| #32           | 6, 12, 26, 31   | PB, BM, Spl      | LOC100040799 / Ppp2r5c             | 0 / 3           | 100040799 / 26931 | 12 F1      | hypothetical protein / protein phosphatase 2, regulatory subunit B, gamma isoform       | 14099 bp / -25348 bp             | F / F       |
| #32           | 12, 19, 31      | PB, BM           | Evi1                               | 25              | 14013             | 3A3        | ecotropic viral integration site 1                                                      | -69704 bp                        | R           |
| #32           | 6, 31           | PB, Spl          | LOC665928* / Bst2*                 | 0 / 0           | 665928 / 69550    | 8 B3.3     | hypothetical protein / bone marrow stromal cell antigen 2                               | 9608 bp / 10217 bp               | R / F       |
| #32           | 6               | PB               | 9930012K11Rik* / Pdlim2*           | 0 / 0           | 268759 / 213019   | 14 D2      | RIKEN cDNA 9930012K11 gene / PDZ and LIM domain 2                                       | 6053 bp (i1) / 17 kb             | R / R       |
| #32           | 6               | PB               | Efna1*                             | 0               | 13636             | 3 F1       | ephrin A1: signaling                                                                    | -3658 bp                         | R           |
| #32           | 6               | PB               | Prx*                               | 0               | 19153             | 7 A3       | periaxin: signaling                                                                     | 7090 bp (i2)                     | R           |
| #32           | 6               | PB               | Chsy1                              | 0               | 269941            | 7 C        | carbohydrate (chondroitin) synthase 1                                                   | 9322 bp (i1)                     | F           |
| #32           | 6               | PB               | <i>Egfl7 / Notch1</i>              | 2 / 33          | 353156 / 18128    | 2 A3       | EGF-like domain 7 / Notch gene homolog 1 (Drosophila)                                   | -3052 bp / -74 kb                | R / F       |
| <b>ST#33</b>  |                 |                  |                                    |                 |                   |            |                                                                                         |                                  |             |
| #33           | 31              | Spl              | EG668996*                          | 0               | 668996            | X A1.3     | predicted gene                                                                          | -303 bp                          | R           |
| #33           | 31              | Spl              | Wdr26                              | 2               | 226757            | 1 H4       | WD repeat domain 26                                                                     | 1188 bp (i1)                     | R           |
| #33           | 31              | Spl              | LOC665939 / Ifngr2                 | 0 / 4           | 665939 / 15980    | 16 C3.3    | similar to cell division cycle 20 homolog (S. cerevisiae) / interferon gamma receptor 2 | 8728 bp (i1) / -24544 bp         | F / R       |
| #33           | 31              | Spl              | Msi2                               | 3               | 76626             | 11 B5-C    | Musashi homolog 2: proliferation and maintenance of CNS stem cell populations           | 5946 bp (i1)                     | R           |
| <b>ST#34</b>  |                 |                  |                                    |                 |                   |            |                                                                                         |                                  |             |
| #34           | 31              | BM               | LOC100043676 / Ptk2b               | 0 / 1           | 100043676 / 19229 | 14 D1      | hypothetical protein LOC100043676 / PTK2 protein tyrosine kinase 2 beta                 | 12393 bp / 18 kb (i1)            | R / R       |
| #34           | 31              | BM               | Acot7*                             | 2               | 70025             | 4 E2       | acyl-CoA thioesterase 7: metabolic                                                      | 12855 bp (i1)                    | F           |
| #34           | 31              | PB               | EG381483                           | 0               | 381483            | 3 H3       | predicted gene                                                                          | 155033 bp                        | F           |
| #34           | 31              | Spl              | Tnni2                              | 1               | 21953             | 7 F5       | troponin I, skeletal, fast 2                                                            | 559 bp (i1)                      | F           |

|               |        |             |                 |       |                |              |                                                              |                        |       |
|---------------|--------|-------------|-----------------|-------|----------------|--------------|--------------------------------------------------------------|------------------------|-------|
| #34           | 31     | Spl         | Sox4            | 75    | 20677          | 13 A3-A5     | SRY-box containing gene 4: TF                                | 2810 bp (e1)           | F     |
| #34           | 31     | Spl         | Pde4d           | 2     | 238871         | 13 D2.1-D2.2 | phosphodiesterase 4D, cAMP specific: signaling               | 991750 bp (i44)        | R     |
| #34           | 31     | Spl         | Phf17           | 1     | 269424         | 3 B          | PHD finger protein 17                                        | -6093 bp               | F     |
| #34           | 6      | PB          | Dusp5           | 1     | 240672         | 19 D2        | dual specificity phosphatase 5: MAPK signaling pathway       | 28600 bp               | F     |
| #34           | 6      | PB          | Tagln2*         | 2     | 21346          | 1 H3         | transgelin 2: actin-associated protein / muscle development  | 1224 bp (i1)           | F     |
| #34           | 6      | PB          | Jun             | 1     | 16476          | 4 C5-C7      | Jun oncogene: TF                                             | -105551 bp             | R     |
| #34           | 6      | PB          | Oscar*          | 1     | 232790         | 7 A1         | osteoclast associated receptor                               | 6512 bp                | R     |
| #34           | 12     | PB          | EG381483        | 0     | 381483         | 3 H3         | predicted gene                                               | 155033 bp              | F     |
| #34           | 12     | PB          | LOC666619       | 0     | 666619         | 9 A4         | similar to ribosomal protein L21                             | 13255 bp               | F     |
| #34           | 12     | PB          | Ubl7 / Sema7a   | 3 / 3 | 69459 / 20361  | 9 C          | ubiquitin-like 7 / semaphorin7A                              | 19 kb (i9) / -11587 bp | R / R |
| #34           | 12     | PB          | Rarg*           | 3     | 19411          | 15 E-F3      | retinoic acid receptor, gamma                                | 1 kb                   | F     |
| #34           | 12     | PB          | Cenpj           | 0     | 219103         | 14 C3        | centromere protein J                                         | 3913 bp (i1)           | F     |
| #34           | 19     | PB          | LOC666619       | 0     | 666619         | 9 A4         | similar to ribosomal protein L21                             | 13252 bp               | R     |
| #34           | 19     | PB          | Arrb1           | 0     | 109689         | 7 E2         | arrestin, beta 1: MAPK signaling pathway                     | 10 kb (i1)             | R     |
| #34           | 19     | PB          | BC030046*       | 0     | 277154         | 14 C3        | cDNA sequence BC030046: pol-like protein                     | -485 bp                | R     |
| #34           | 19     | PB          | Ptk2b           | 1     | 19229          | 14 D1        | PTK2 protein tyrosine kinase 2 beta                          | 19 kb (i1)             | R     |
| #34           | 19     | PB          | Recq15          | 1     | 170472         | 11 E2        | RecQ protein-like 5: DNA repair                              | 21 kb (i7)             | F     |
| <b>ST#35</b>  |        |             |                 |       |                |              |                                                              |                        |       |
| #35           | 31     | BM, Spl     | Galnt2          | 2     | 108148         | 8 E2         | UDP-N-acetyl-alpha-D-galactosamine                           | 95336 bp (i6)          | R     |
| #35           | 31     | PB          | Arid1a          | 5     | 93760          | 4 D3         | AT rich interactive domain 1A (Swi1 like)                    | -62134 bp              | R     |
| #35           | 31     | PB          | Tcfec           | 0     | 21426          | 6 E4-G       | transcription factor EC                                      | 2418 bp (i1)           | F     |
| #35           | 31     | Spl         | Zfp217          | 6     | 228913         | 2 H3         | zinc finger protein 217                                      | -29735 bp              | F     |
| #35           | 31     | Spl         | B930007M17Rik   | 1     | 381476         | 3 H1         | RIKEN cDNA B930007M17 gene                                   | 41752 bp (i6)          | R     |
| <b>MPP#36</b> |        |             |                 |       |                |              |                                                              |                        |       |
| # 36          | 26     | PB          | Ablim1          | 2     | 226251         | 19 D2        | actin-binding LIM protein 1                                  | 96551 bp (i6)          | R     |
| # 36          | 26     | PB          | EG628871        | 0     | 628871         | X A1.3       | predicted gene, EG628871                                     | 71615 bp               | F     |
| # 36          | 26     | PB          | Trim16*         | 0     | 94092          | 11 B2        | tripartite motif-containing 16: zink finger                  | -719 bp                | R     |
| # 36          | 24     | PB          | P2ry6*          | 0     | 233571         | 7 E3         | pyrimidineric receptor P2Y, G-protein coupled, 6             | 14349 bp (i1)          | R     |
| <b>MPP#37</b> |        |             |                 |       |                |              |                                                              |                        |       |
| #37           | 31     | PB, BM, Spl | Mgll            | 1     | 23945          | 6 D1         | monoglyceride lipase                                         | 86 kb (i5)             | R     |
| #37           | 26, 31 | PB          | 1810011O10Rik   | 1     | 69068          | 8 A2         | RIKEN cDNA 1810011O10 gene: apoptosis                        | 66883 bp               | R     |
| #37           | 26     | PB          | Aff4*           | 1     | 93736          | 11 B1.3      | AF4/FMR2 family, member 4: TF                                | 25902 bp (i4)          | R     |
| #37           | 26     | PB          | LOC666495       | 0     | 666495         | 2 A1         | similar to Presenilin associated, rhomboid-like              | -21813 bp              | R     |
| #37           | 26     | PB          | Serpnb1a*       | 0     | 66222          | 13 A4        | serine (or cysteine) peptidase inhibitor, clade B, member 1a | 18224 bp               | F     |
| #37           | 26     | PB          | Ctsg*           | 0     | 13035          | 14 C3        | cathepsin G: proteolysis                                     | 625 bp (i2)            | R     |
| #37           | 26     | PB          | LOC667119 / Fos | 0 / 6 | 667119 / 14281 | 12 D2        | hypothetical LOC667119 / FBJ osteosarcoma oncogene           | -15359 bp / -57393 bp  | R / R |

| MPP#38 |        |                  |                                |        |                    |         |                                                                                        |                      |       |
|--------|--------|------------------|--------------------------------|--------|--------------------|---------|----------------------------------------------------------------------------------------|----------------------|-------|
| #38    | 26, 31 | PB, Liv          | <i>Snx31</i>                   | 0      | 66696              | 15 C    | sorting nexin 31: signaling                                                            | -8114 bp             | R     |
| #38    | 26     | PB               | <i>Bach2</i>                   | 14     | 12014              | 4 A5    | BTB and CNC homology 2: neuronal cells differentiation                                 | 132926 bp (i2)       | F     |
| #38    | 26, 31 | PB, Spl, Liv     | D16Erd472e                     | 3      | 67102              | 16 C3.1 | DNA segment, Chr 16, ERATO Doi 472, expressed                                          | 73231 bp             | R     |
| #38    | 26     | PB               | <i>Riok2</i>                   | 0      | 67045              | 17 A3.1 | RIO kinase 2 (yeast): signal transduction                                              | 4266 bp (i1)         | F     |
| #38    | 26     | PB               | LOC100041377*                  | 0      | 100041377          | 18 B1   | hypothetical protein LOC100041377                                                      | 3271 bp              | F     |
| #38    | 31     | BM               | <i>Mtch2*</i>                  | 0      | 56428              | 2 E1    | mitochondrial carrier homolog 2 (C. elegans)                                           | -955 bp              | F     |
| #38    | 31     | BM               | <i>Cradd</i>                   | 0      | 12905              | 10 C2   | CASP2 and RIPK1 domain containing adaptor with death domain                            | 187 kb               | F     |
| #38    | 31     | BM               | <i>Slc22a16</i>                | 0      | 70840              | 10 B1   | solute carrier family 22 (organic cation transporter), member 16                       | -56050 bp            | F     |
| #38    | 31     | PB, BM, Spl, Liv | <i>Egfl7 / Notch1</i>          | 2 / 33 | 353156 / 18128     | 2 A3    | EGF-like domain 7 / Notch gene homolog 1 (Drosophila)                                  | - 10411 bp / - 66 kb | F / R |
| #38    | 31     | Spl              | 2310033K02Rik                  | 0      | 69553              | 2 H3    | RIKEN cDNA 2310033K02 gene                                                             | -450 bp              | F     |
| MPP#39 |        |                  |                                |        |                    |         |                                                                                        |                      |       |
| #39    | 26     | PB               | <i>Irf1</i>                    | 1      | 16362              | 11 B1.3 | interferon regulatory factor 1: TF                                                     | -7541 bp             | R     |
| #39    | 26     | PB               | <i>Cenpc1*</i>                 | 0      | 12617              | 5 E2-E5 | centromere protein C1                                                                  | -491 bp              | F     |
| #39    | 26     | PB               | <i>Il4ra</i>                   | 3      | 16190              | 7 F3    | interleukin 4 receptor, alpha: hematopoietic cell lineage                              | 30973 bp             | F     |
| #39    | 26     | PB               | 6720432D03Rik                  | 0      | 77740              | 9 A5.1  | RIKEN cDNA 6720432D03 gene                                                             | -21626 bp            | F     |
| #39    | 26     | PB               | <i>Cd47</i>                    | 3      | 16423              | 16 B5   | CD47 antigen (Rh-related antigen, integrin-associated signal transducer)               | -17521 bp            | R     |
| #39    | 26     | PB               | <i>Raf1</i>                    | 1      | 110157             | 6 E3    | v-raf-leukemia viral oncogene 1                                                        | -19821 bp            | F     |
| #39    | 31     | BM               | LOC100039985                   | 0      | 100039985          | 3 A1    | hypothetical protein LOC100039985                                                      | 30845 bp             | R     |
| #39    | 31     | BM               | <i>Ptpn1</i>                   | 1      | 19246              | 2 H3    | protein tyrosine phosphatase, non-receptor type 1: insulin receptor signalling pathway | 2995 bp (i1)         | R     |
| #39    | 31     | BM               | <i>H3f3a / BC031781</i>        | 0 / 4  | 15078 / 208768     | 1 D2.3  | H3 histone, family 3A / cDNA sequence BC031781                                         | -883 bp / -35 kb     | F / R |
| #39    | 31     | PB               | <i>Mfhas1</i>                  | 0      | 52065              | 8 A4    | malignant fibrous histiocytoma amplified sequence 1: Ras_like_GTPase                   | 62 kb (i1)           | F     |
| #39    | 31     | PB               | <i>Wdr42a*</i>                 | 0      | 98193              | 1 H3    | WD repeat domain 42A                                                                   | 1030 bp (i1)         | R     |
| #39    | 31     | Spl              | <i>Mdfic</i>                   | 0      | 16543              | 6 A1    | MyoD family inhibitor domain containing: transcription                                 | 74202 bp (i3)        | F     |
| #39    | 31     | Spl              | <i>Med27</i>                   | 0      | 68975              | 2 A3    | mediator complex subunit 27: transcription                                             | 108 kb (i3)          | R     |
| MPP#40 |        |                  |                                |        |                    |         |                                                                                        |                      |       |
| #40    | 26     | PB               | <i>Centa1</i>                  | 0      | 231821             | 5 G2    | centaurin, alpha 1: pleckstrin homology (PH) domain                                    | 8487 bp (i3)         | R     |
| #40    | 31     | Spl              | LOC546780                      | 0      | 546780             | 2 H3    | similar to ribosomal protein L9                                                        | -4936 bp             | R     |
| #40    | 31     | Spl              | <i>Cbfa2t2</i>                 | 0      | 12396              | 2 C3.2  | core-binding factor, runt domain, alpha subunit 2, translocated to, 2 (human): TF      | -9182 bp             | R     |
| #40    | 31     | Spl              | LOC100042432* / <i>Ptpn 7*</i> | 0 / 2  | 100042432 / 320139 | 1 E4    | hypothetical protein / protein tyrosine phosphatase, non-receptor type 7               | 1 kb / -2kb          | F / R |

Insertional coordinates are given based on the NCBI database, January-July 2008; RTCGD membership is given based on the database's information accessible between January-July, 2008; PB, total peripheral blood;

BM, total bone marrow; Spl, spleen; Liv, liver; TSS, transcriptional start site (NCBI definition); \*, located in gene dense region: more than 3 genes within 50 kb from each RVIS side; in italics, common locus for retroviral integration sites within this set of data; n.a., not applicable.
