# Supplementary material
Source: PubMed Central journal article supplement (PMC2835258)
Supplement: mt2009134x9.pdf [file mt2009134x9.pdf]

**Supplementary Table S4: Vector insertion sites (VIS) distribution according to gene classes (+/- 150 kb), DBISA.**

| Sets                           | gamma-retroviral LSK #11-15 and STHSC #31-35 | gamma-retroviral LK #16-20 and MPP #36-40 | gamma-retroviral IDDb neutral | gamma-retroviral IDDb all | Lentiviral LTHSC #41-45 and STHSC #46-50 |
|--------------------------------|----------------------------------------------|-------------------------------------------|-------------------------------|---------------------------|------------------------------------------|
| <b>N° of VIS</b>               | 107                                          | 63                                        | 161                           | 278                       | 43                                       |
| <b>N° of genes</b>             | 745                                          | 342                                       | 918                           | 1607                      | 91                                       |
| <b>Classes</b>                 |                                              |                                           |                               |                           |                                          |
| <b>RTCGD CIS (%)</b>           | 8.0                                          | 9.9                                       | 7.9                           | 8.7                       | 1.1*                                     |
| <b>RTCGD hits (%)</b>          | 17.9                                         | 16.4                                      | 17.6                          | 18.6                      | 5.5*                                     |
| <b>Tumor suppressor (%)</b>    | 0.4                                          | 0                                         | 0.3                           | 0.3                       | 0                                        |
| <b>Oncogenesis (%)</b>         | 1.6                                          | 2.3                                       | 2.3                           | 2.8                       | 0                                        |
| <b>Signal transduction (%)</b> | 13.0                                         | 13.4                                      | 13.5                          | 14.3                      | 20.9                                     |
| <b>Unclassified (%)</b>        | 26.4                                         | 25.4                                      | 25.6                          | 26.6                      | 19.8                                     |

Analysis performed for window +/-150 kb from VIS; Sets, indicate datasets analysed: LSK, STHSC, LTHSC, LK, MPP VIS obtained from primary recipients of LSK, STHSC, LTHSC, LK and MPP EGFP progeny respectively; IDDb neutral: insertional dominance database<sup>24</sup> re-analysis focusing on VIS from primary recipients with fluorescent or surface markers; IDDb all: re-analysis of all entries of the IDDb; Classes, different categories analysed, corresponding to RTCGD genes from <http://rtcgd.abcc.ncifcrf.gov> or to biological process retrieved from PantherDB [www.pantherdb.org](http://www.pantherdb.org). Data files downloaded June 21, 2008. For each dataset we analyzed the indicated amount of sequences (N° of VIS). This yielded the indicated number of genes within a +/-150 kb window (N° of genes). For each class, the % of genes overlapping with the class is given. \*, Fisher Exact 2-sided p<0.05, compared to the gamma-retroviral LSK and STHSC datasets.
