# Supplementary material
Source: PubMed Central journal article supplement (PMC2835258)
Supplement: mt2009134x10.pdf [file mt2009134x10.pdf]

|              |    |        |                        |      |           |        |                                                                                          |             |      |
|--------------|----|--------|------------------------|------|-----------|--------|------------------------------------------------------------------------------------------|-------------|------|
| #45          | 32 | PB, BM | Atp5f1*                | 0    | 11950     | 3 F2.2 | ATP synthase, H+ transporting, mitochondrial F0 complex, subunit b, isoform 1: transport | 11 kb (i6)  | F    |
| <b>ST#46</b> |    |        |                        |      |           |        |                                                                                          |             |      |
| #46          | 32 | BM     | hit into repeat region | n.a. | n.a.      | n.a.   | n.a.                                                                                     | n.a.        | n.a. |
| #46          | 32 | BM     | Magi3                  | 0    | 99470     | 3 F2.2 | membrane associated guanylate kinase, WW and PDZ domain containing 3                     | 17 kb (i1)  | F    |
| #46          | 32 | BM     | Irak1bp1               | 0    | 65099     | 9 E2   | interleukin-1 receptor-associated kinase 1 binding protein 1: I-kappa B kinase           | 7 kb (i1)   | R    |
| <b>ST#47</b> |    |        |                        |      |           |        |                                                                                          |             |      |
| # 47         | 32 | BM     | hit into repeat region | n.a. | n.a.      | n.a.   | n.a.                                                                                     | n.a.        | n.a. |
| # 47         | 32 | BM     | non coding +/- 150 kb  | n.a. | n.a.      | 11A1   | n.a.                                                                                     | n.a.        | n.a. |
| <b>ST#48</b> |    |        |                        |      |           |        |                                                                                          |             |      |
| #48          | 32 | BM     | non coding +/- 150 kb  | n.a. | n.a.      | 15B3.2 | n.a.                                                                                     | n.a.        | n.a. |
| #48          | 32 | PB, BM | Rfc1                   | 0    | 19687     | 5 C3.1 | replication factor C (activator 1) 1: replication, transcription                         | 50 kb (i11) | F    |
| <b>ST#49</b> |    |        |                        |      |           |        |                                                                                          |             |      |
| #49          | 32 | BM     | non coding +/- 150 kb  | n.a. | n.a.      | 2C1.1  | n.a.                                                                                     | n.a.        | n.a. |
| #49          | 32 | BM     | no s.h.                | n.a. | n.a.      | n.a.   | n.a.                                                                                     | n.a.        | n.a. |
| #49          | 32 | PB     | no s.h.                | n.a. | n.a.      | n.a.   | n.a.                                                                                     | n.a.        | n.a. |
| <b>ST#50</b> |    |        |                        |      |           |        |                                                                                          |             |      |
| # 50         | 32 | PB, BM | LOC100043741           | 0    | 100043741 | 17 E5  | predicted gene, 100043741                                                                | -120 kb     | F    |
| # 50         | 32 | BM     | Serbp1                 | 0    | 66870     | 6 C1   | Serpine1: mRNA binding protein 1                                                         | 13 kb (i5)  | F    |
| # 50         | 32 | PB, BM | Tnc                    | 0    | 21923     | 4 C1   | tenascin C: signal transduction                                                          | -79 kb      | R    |
| # 50         | 32 | PB     | no s.h.                | n.a. | n.a.      | n.a.   | n.a.                                                                                     | n.a.        | n.a. |

Insertional coordinates are given based on the NCBI database, July 2008; RTCGD membership is given based on the database's information accessible on July 2008;

PB, total peripheral blood; BM, total bone marrow; TSS, transcriptional start site (NCBI definition); \*, located in gene dense region: more than 3 genes within of 50 kb from each RVIS side; n.a., not applicable; no s.h., no significant homology found.
