# Supplementary material
Source: PubMed Central journal article supplement (PMC2835258)

# Supplementary Figure S1

**a**

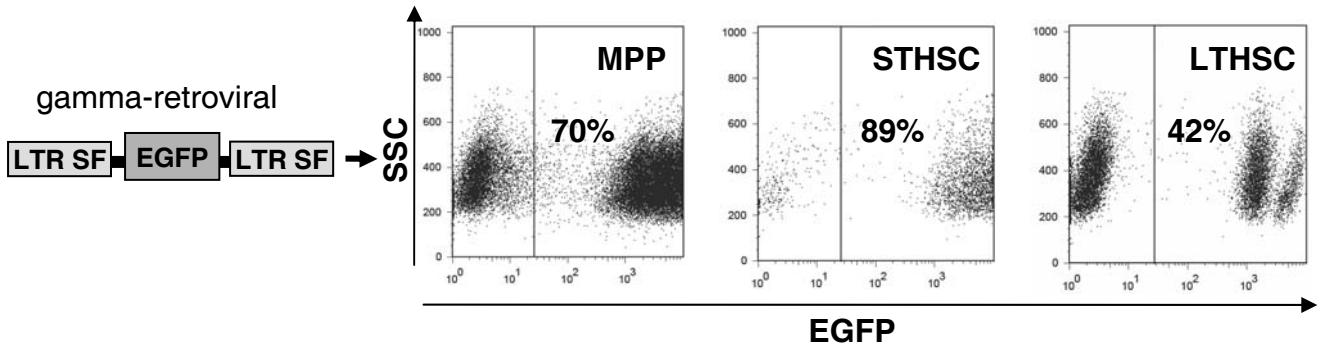

**b**

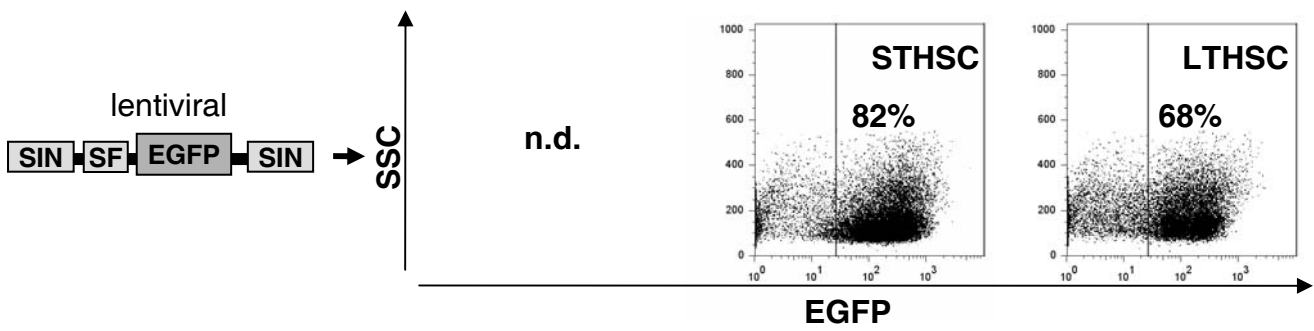

Supplement: mt2009134x1.pdf [file mt2009134x1.pdf]

## Supplementary Figure S2

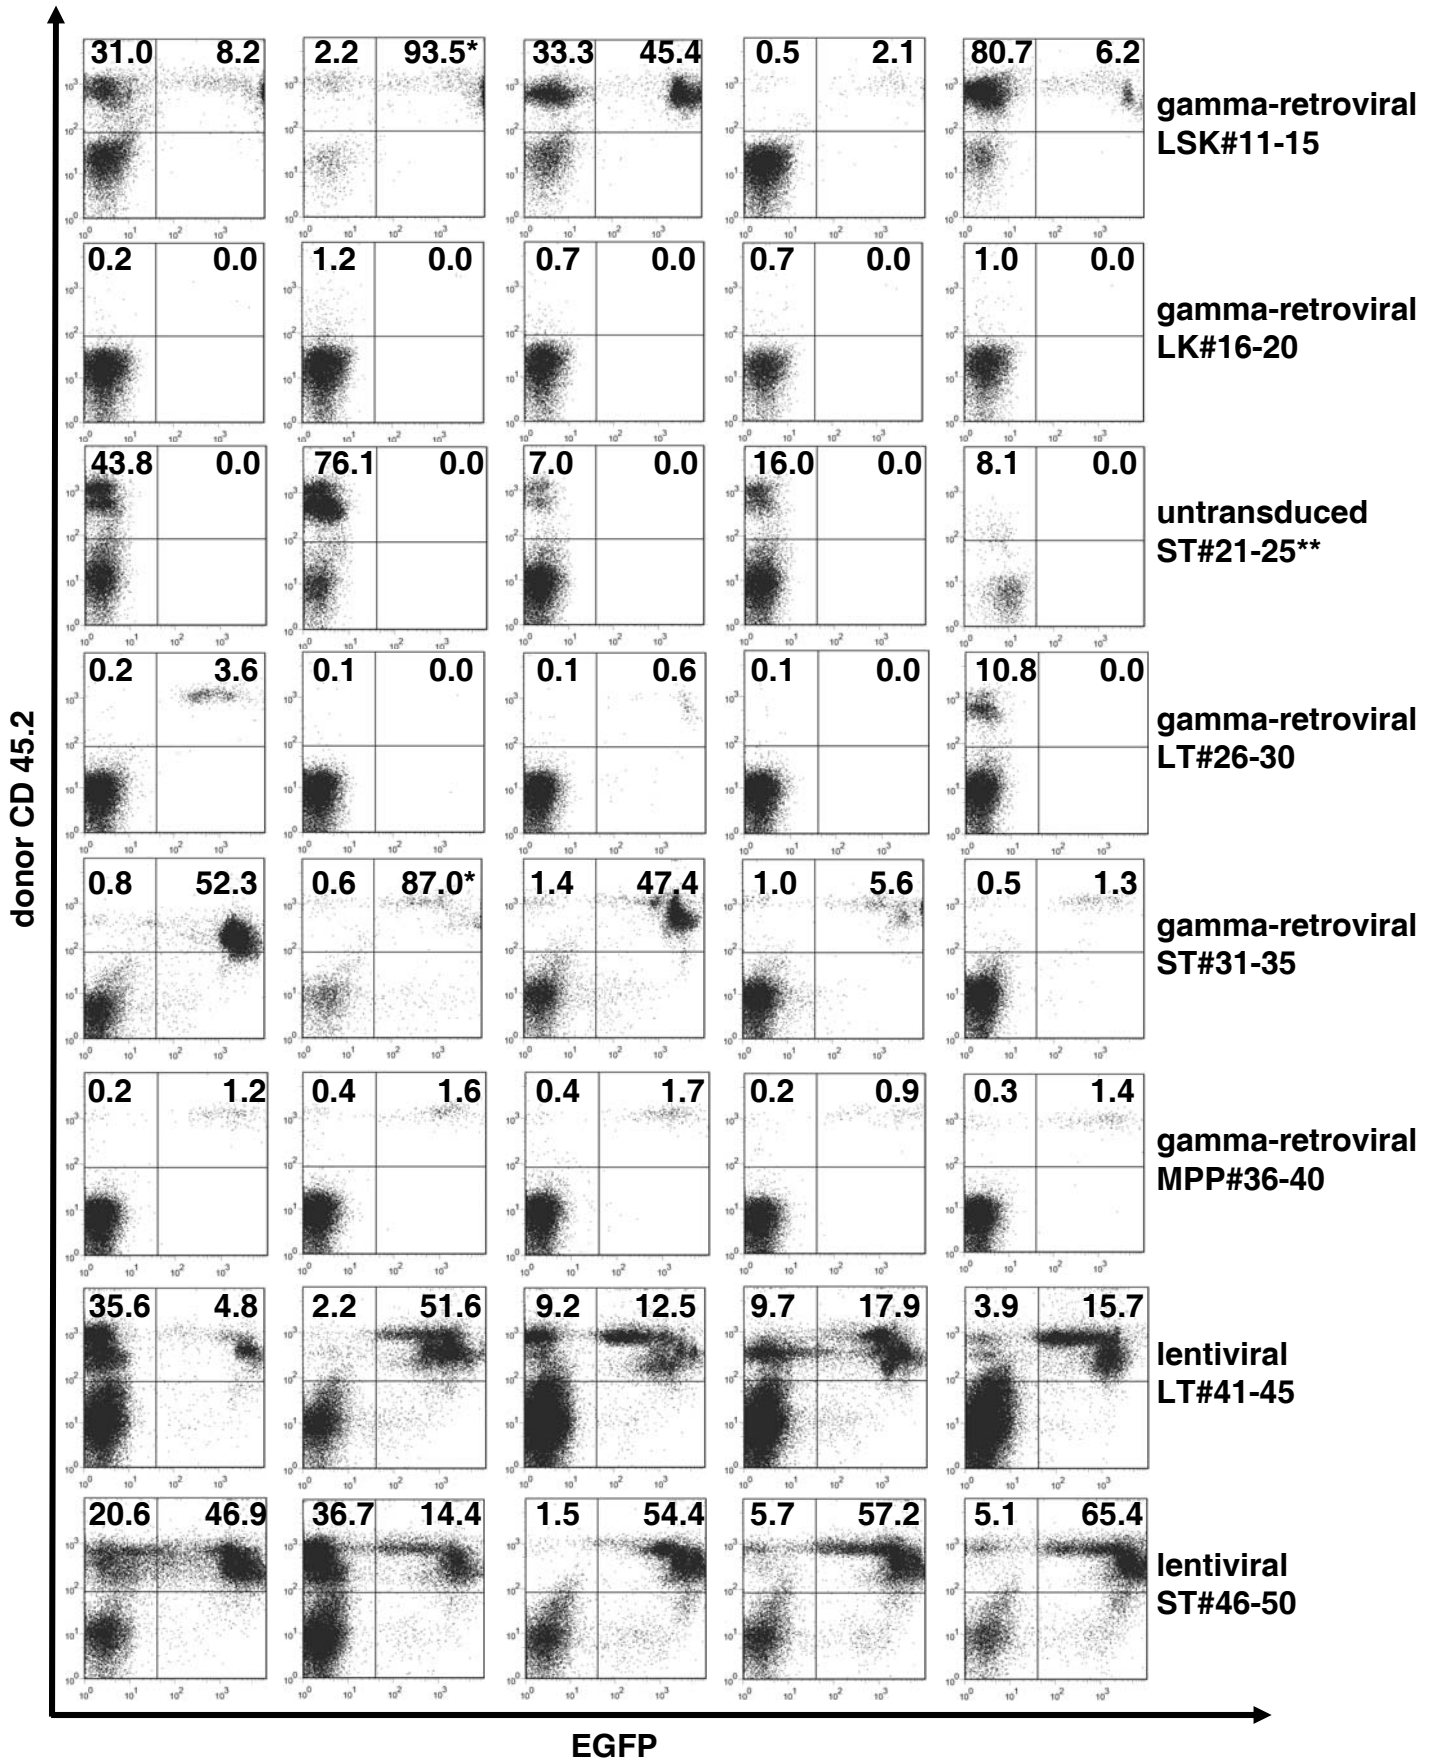

Supplement: mt2009134x2.pdf [file mt2009134x2.pdf]

## Supplementary Figure S3

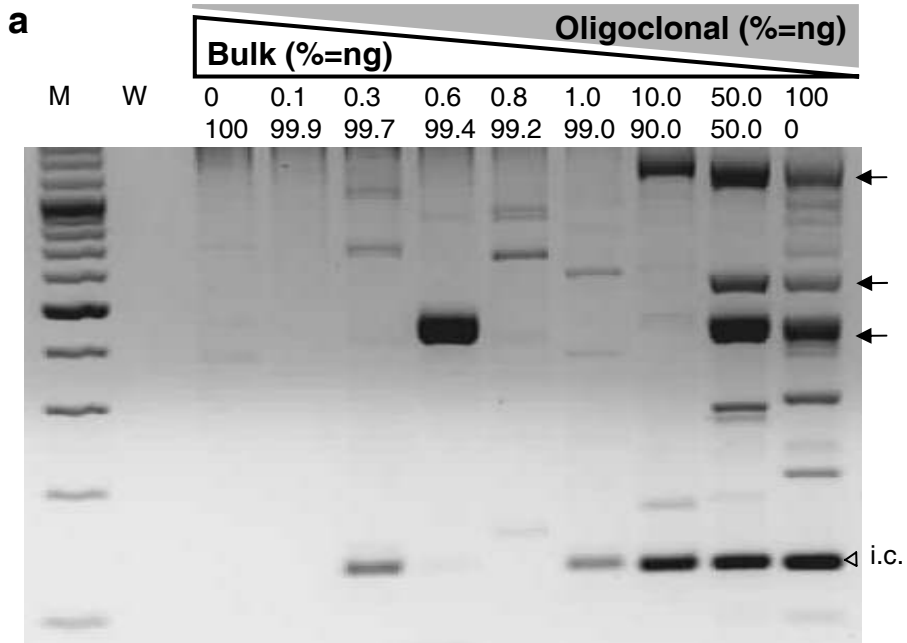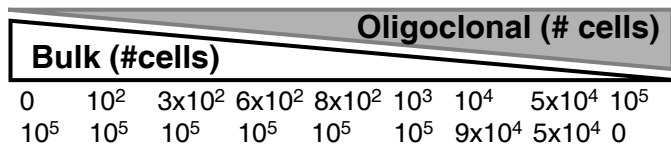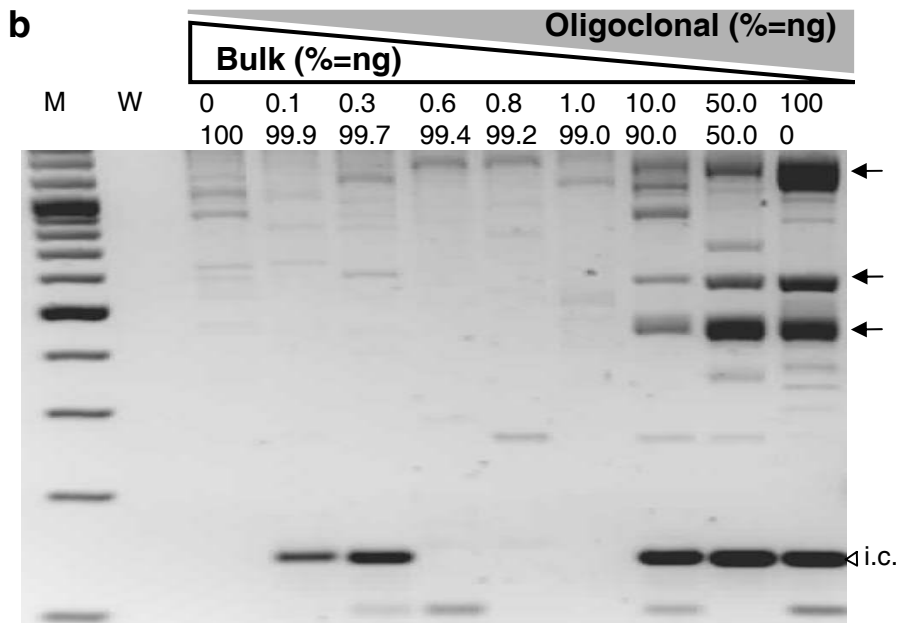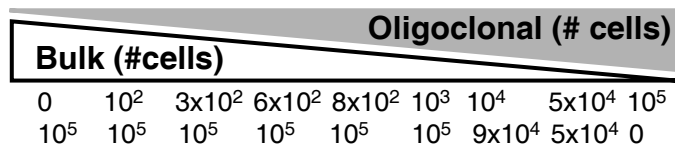

Supplement: mt2009134x3.pdf [file mt2009134x3.pdf]

## Supplementary Figure S4

**a**

gamma-retroviral

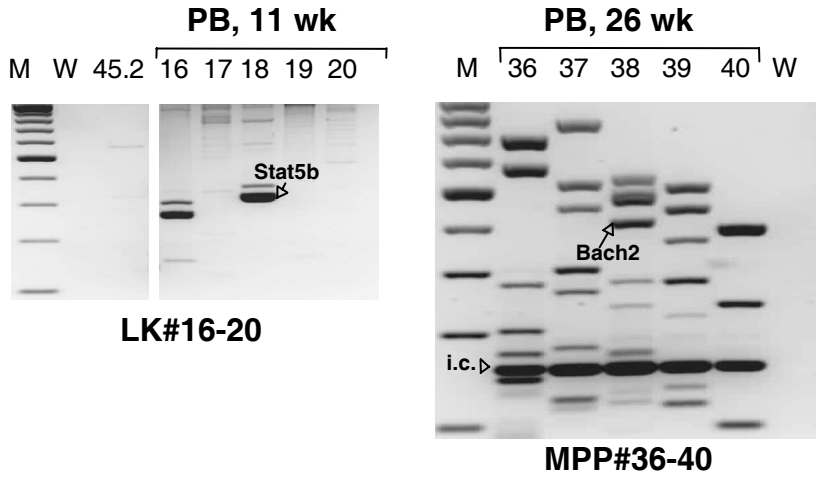

**b**

gamma-retroviral

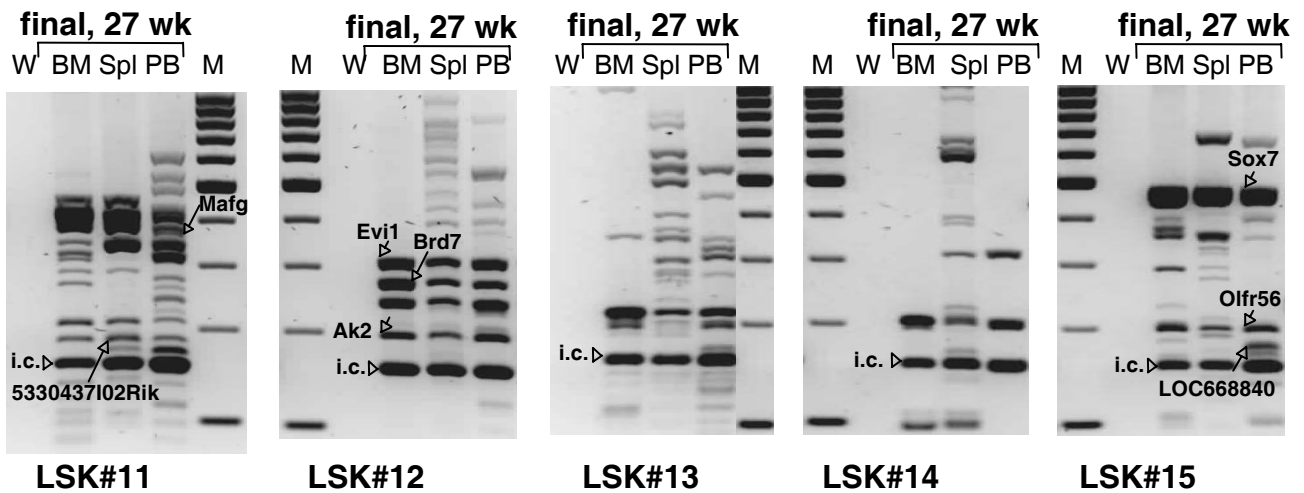

**c**

gamma-retroviral

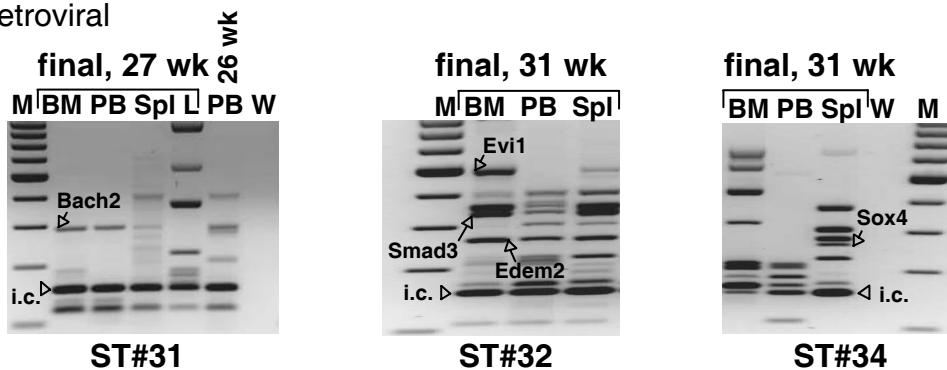

Supplement: mt2009134x4.pdf [file mt2009134x4.pdf]

## Supplementary Figure S5

**a**

lentiviral

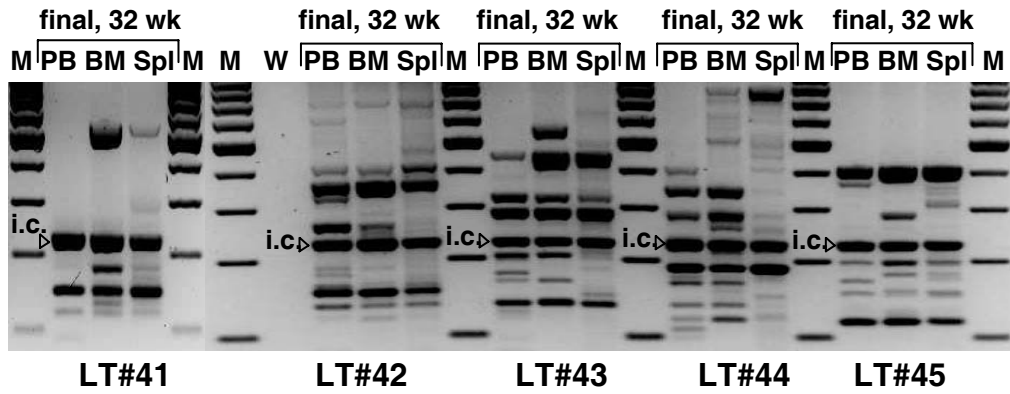

**b**

lentiviral

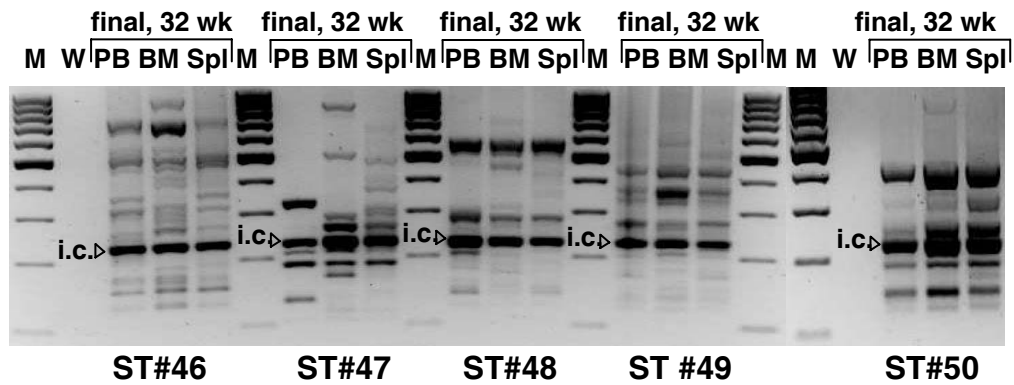

Supplement: mt2009134x5.pdf [file mt2009134x5.pdf]
